# Supplementary material
Source: publisher figshare collection journal article supplement (https://acs.figshare.com/ndownloader/files/15176891)
Supplement: Supplementary file 1 [file 15176891]

## Supporting Information

# Fabrication of Three-Dimensional Flower-Like Heterogeneous Fe<sub>3</sub>O<sub>4</sub>/Fe Particles with Tunable Chemical Composition and Microwave Absorption Performance

Xueai Li,<sup>\*,†</sup> Xiangyan Qu,<sup>†</sup> Zhan Xu,<sup>‡</sup> WenQi Dong,<sup>†</sup> Fengyan Wang,<sup>†</sup> Wanchun Guo,<sup>†</sup> Haiyan Wang,<sup>†</sup> and Yunchen Du<sup>\*,‡</sup>

<sup>†</sup>College of Environment and Chemical Engineering, Yanshan University, Qinhuangdao, 066004, China.

<sup>‡</sup>MIIT Key Laboratory of Critical Materials Technology for New Energy Conversion and Storage, School of Chemistry and Chemical Engineering, Harbin Institute of Technology, Harbin 150001, PR China.

\*Corresponding Authors

Tel: +86-335-8061569, E-mail: [lixueai@ysu.edu.cn](mailto:lixueai@ysu.edu.cn) (Xueai. Li);

Tel: +86-451-8641-8750, E-mail: [yunchendu@hit.edu.cn](mailto:yunchendu@hit.edu.cn) (Yunchen. Du).

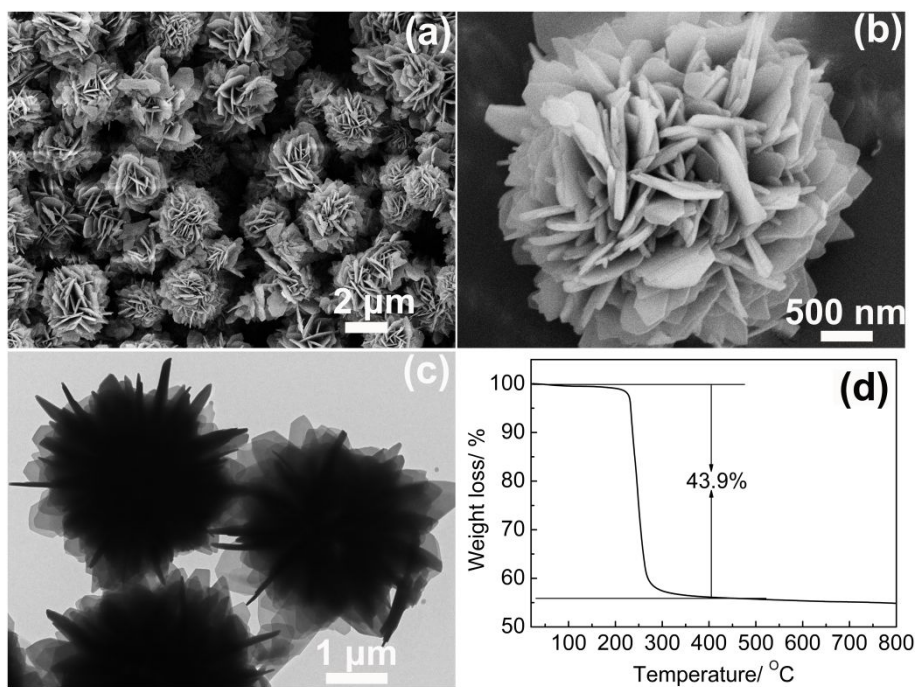

**Figure S1.** SEM (a, b), TEM (c) images, and TGA curve (d) of iron alkoxides precursor.

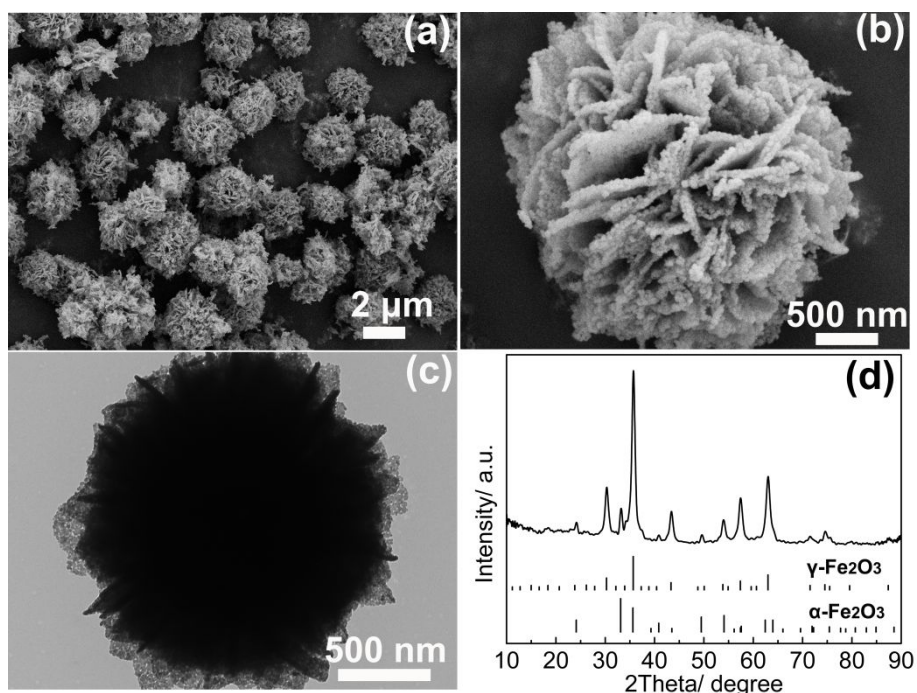

**Figure S2.** SEM (a, b), TEM (c) images, and XRD pattern (d) of iron oxides obtained by pyrolysis of precursor in air at 400 °C.

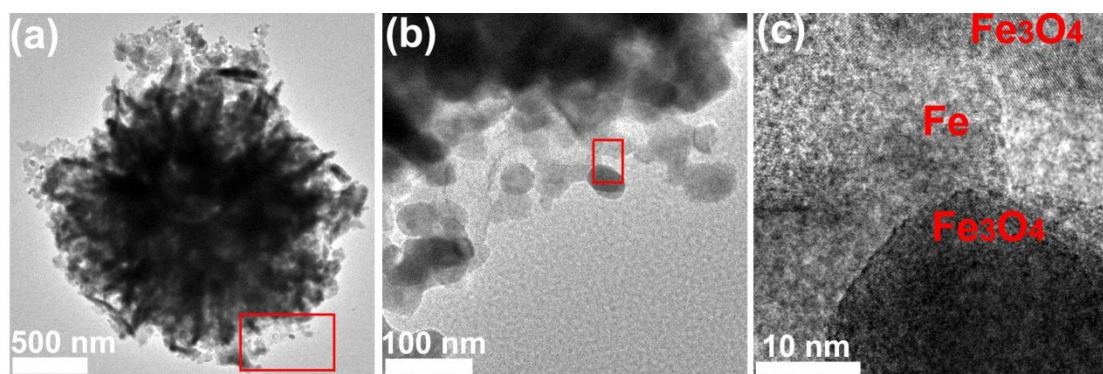

**Figure S3.** TEM image of F-350 (a), local magnification (b) of rectangle part in (a), HRTEM image (c) of rectangle part in (b).

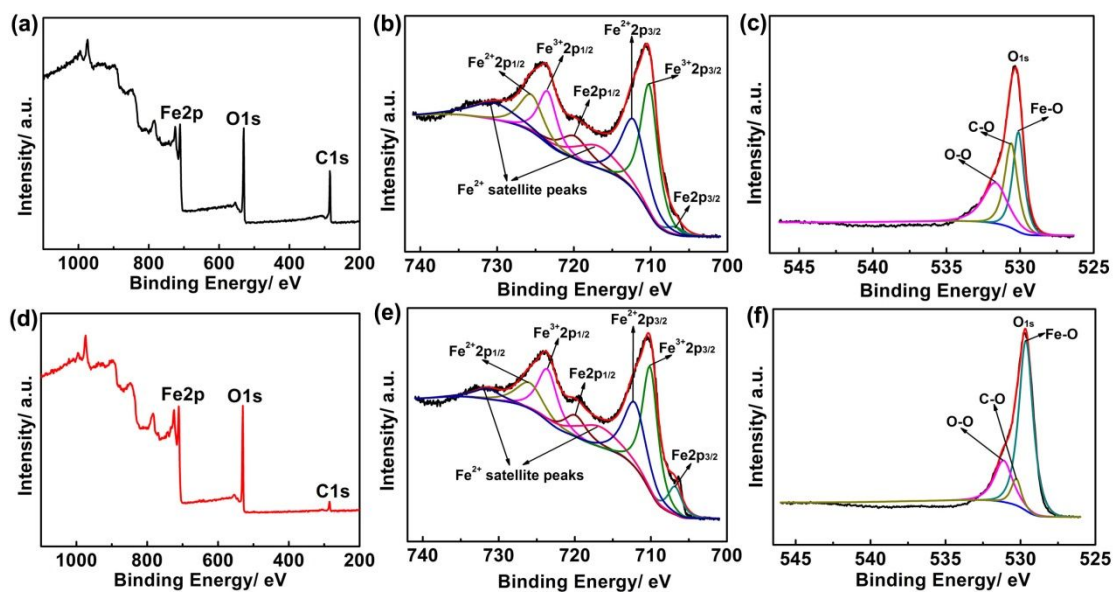

**Figure S4.** XPS survey (a), Fe 2p (b), and O 1s spectra (c) of F-350, and XPS survey (d), Fe 2p (e), and O 1s spectra (f) of F-450.

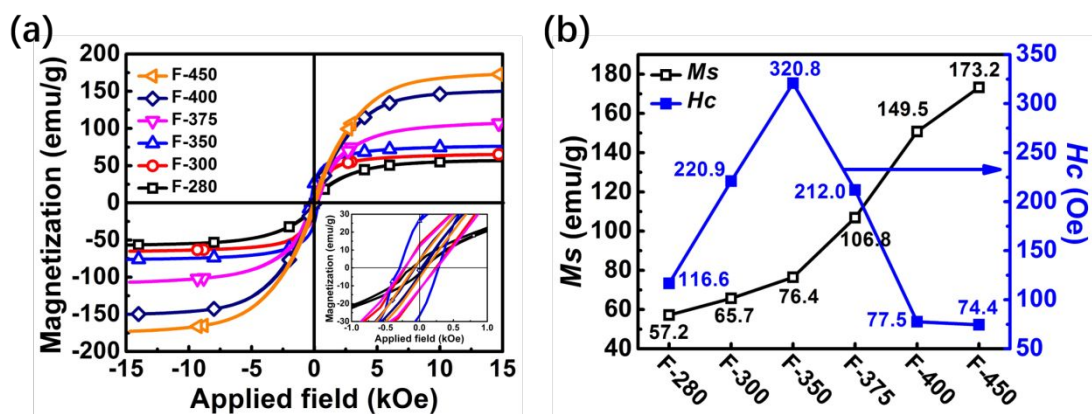

**Figure S5.** Magnetic hysteresis loops of 3D flower-like  $\text{Fe}_3\text{O}_4/\text{Fe}$  at room temperature (a), and  $M_s$  and  $H_c$  values (b) of all samples. Inset in (a) is a magnification of magnetic hysteresis loops.

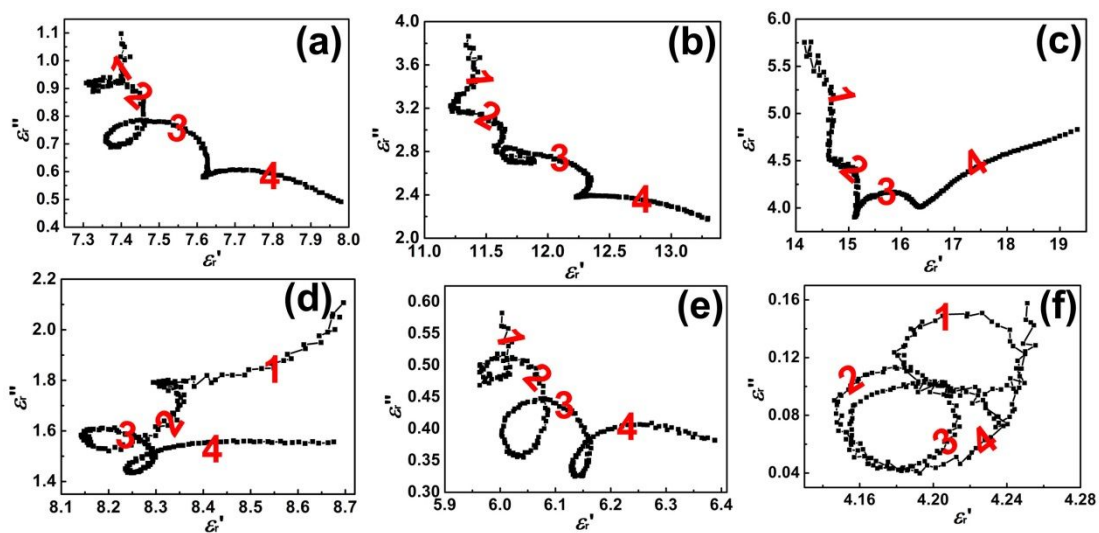

**Figure S6.** Cole-Cole plots of F-280 (a), F-300 (b), F-350 (c), F-375 (d), F-400 (e), and F-450 (f).

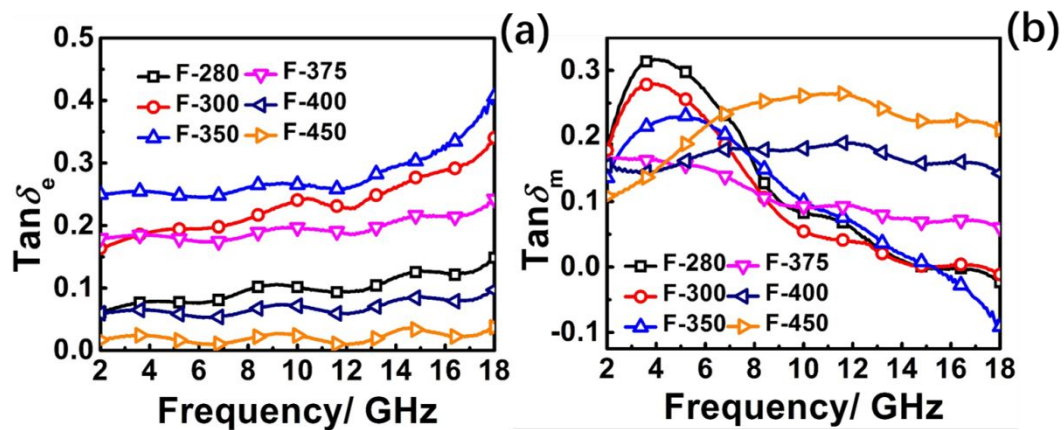

**Figure S7.** Frequency-dependent  $\tan \delta_e$  (a) and  $\tan \delta_m$  (b) of flower-like  $\text{Fe}_3\text{O}_4/\text{Fe}$ .



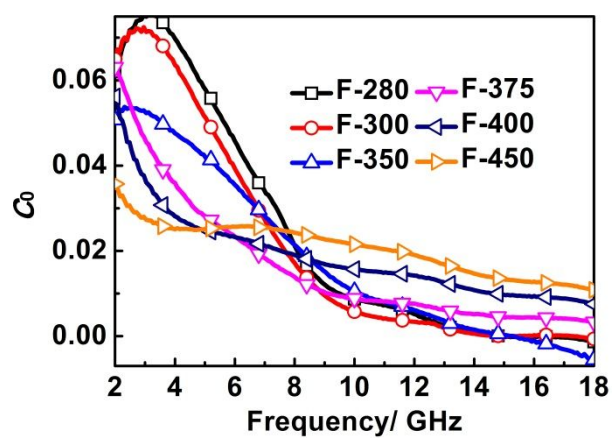

**Figure S8.**  $C_0$  values of  $\text{Fe}_3\text{O}_4/\text{Fe}$  composites in the frequency range of 2.0-18.0 GHz.

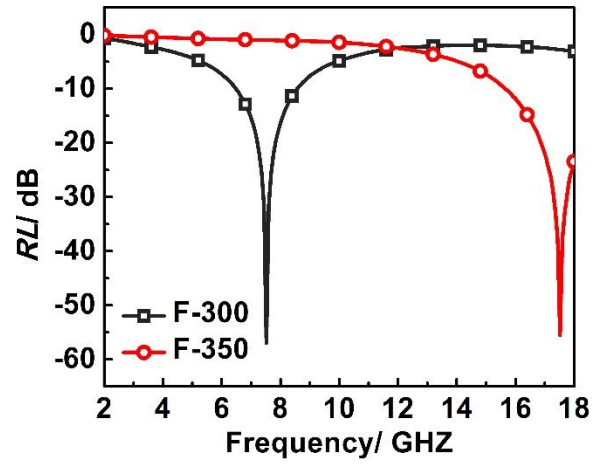

**Figure S9.** Reflection loss curves of F-300 (d=2.97 mm) and F-350 (d=1.19 mm).

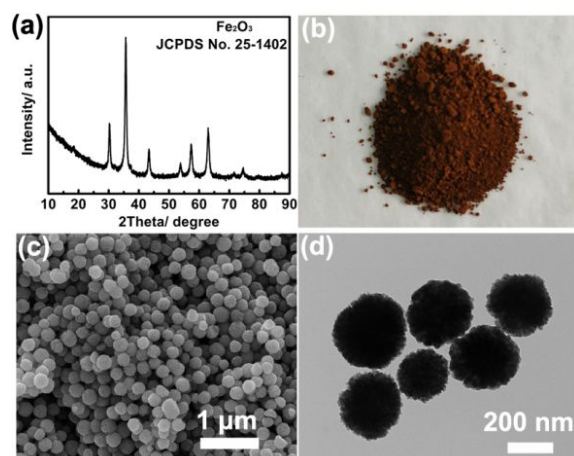

**Figure S10.** XRD (a), optical image (b), SEM image (c), and TEM image (d) of Fe<sub>2</sub>O<sub>3</sub> spheres.

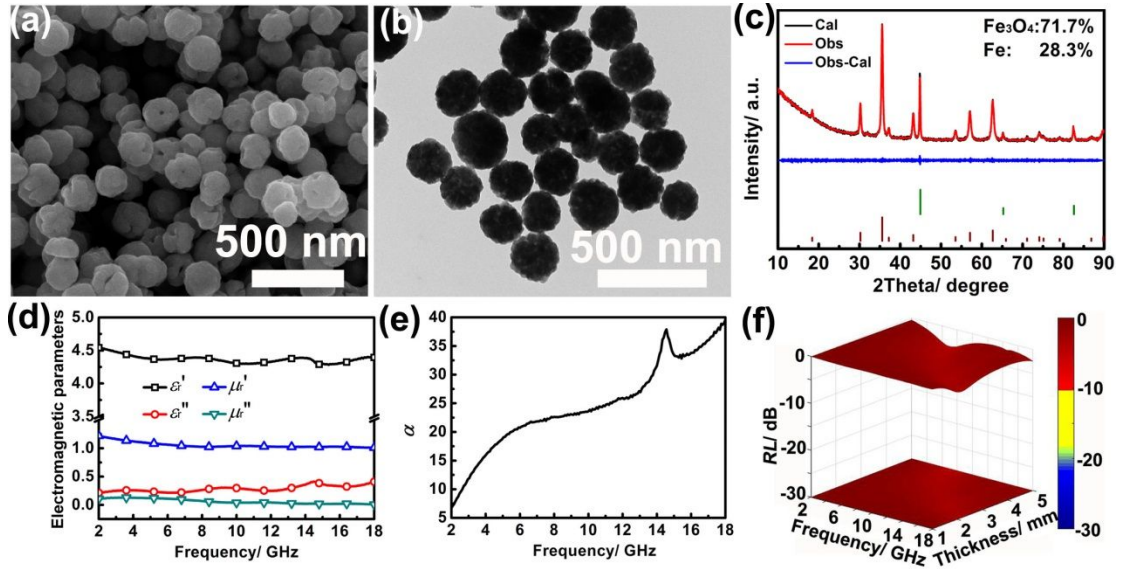

**Figure S11.** SEM image (a), TEM image (b), XRD pattern (c),  $\epsilon_r$  and  $\mu_r$  (d), attenuation constant (e), and reflection loss map of C-350 (f).

**Table S1.** ICP results of Fe<sub>3</sub>O<sub>4</sub>/Fe composites.

| sample | Final concentration<br>(mg/L) | ICP tested value<br>(mg/L) | Mass ratio (%) |                                |
|--------|-------------------------------|----------------------------|----------------|--------------------------------|
|        |                               |                            | Fe             | Fe <sub>3</sub> O <sub>4</sub> |
| F-280  | 5.00                          | 3.636                      | 0              | 100                            |
| F-300  | 5.00                          | 3.907                      | 20.1           | 79.9                           |
| F-350  | 5.00                          | 4.018                      | 28.4           | 71.6                           |
| F-375  | 5.00                          | 4.215                      | 43.0           | 57.0                           |
| F-400  | 5.00                          | 4.899                      | 93.8           | 6.2                            |
| F-450  | 5.00                          | 4.983                      | 100            | 0                              |
